# Supplementary material for: Biobased cross-linked polyurethanes obtained from ester/amide pseudo-diols of fatty acid derivatives synthesized by thiol–ene coupling
Source: Royal Society of Chemistry journal article supplement (doi:10.1039/c1py00479d), 2011-12-12
Supplement: c1py00479d.pdf [file c1py00479d.pdf]

## SUPPORTING INFORMATION FOR

# **Biobased polyurethanes obtained from ester/amide pseudo-diols of fatty compounds synthesized by thiol-ene coupling**

*M. Desroches<sup>a</sup>, S. Caillol<sup>a</sup>, R. Auvergne<sup>a</sup>, B. Boutevin<sup>a</sup>, G. David<sup>\*a</sup>*

<sup>a</sup>Institut Charles Gerhardt UMR CNRS 5253 Equipe Ingénierie et Architecture  
Macromoléculaire, Ecole Nationale Supérieure de Chimie de Montpellier, 8 rue de  
l'Ecole Normale, 34296 Montpellier Cedex 05, France.

Corresponding author e-mail address: [ghislain.david@enscm.fr](mailto:ghislain.david@enscm.fr)

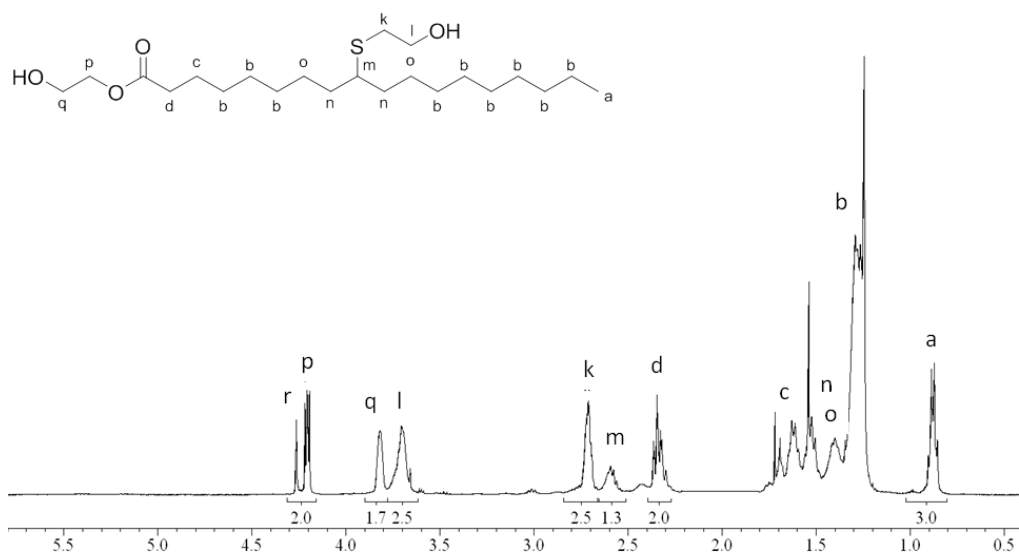

**Figure S1.** <sup>1</sup>H NMR of MEC<sub>2</sub>

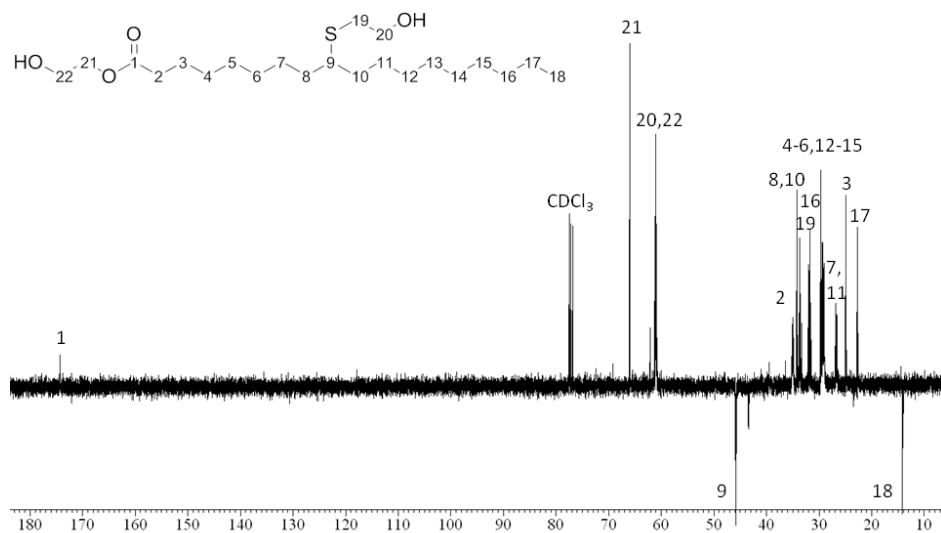

**Figure S2.**  $^{13}\text{C}$  NMR of MEC<sub>2</sub>

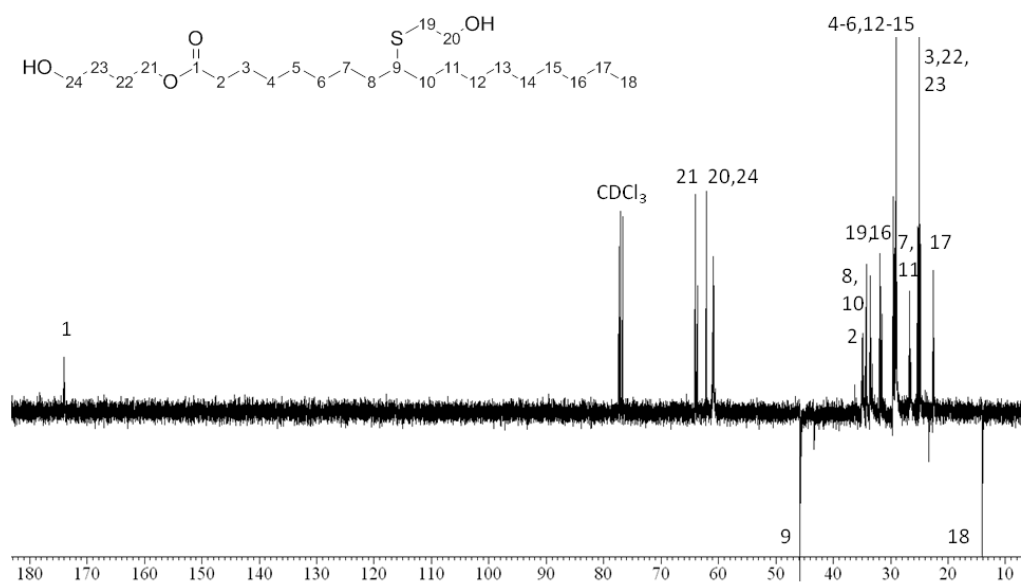

**Figure S3.**  $^{13}\text{C}$  NMR of MEC<sub>4</sub>

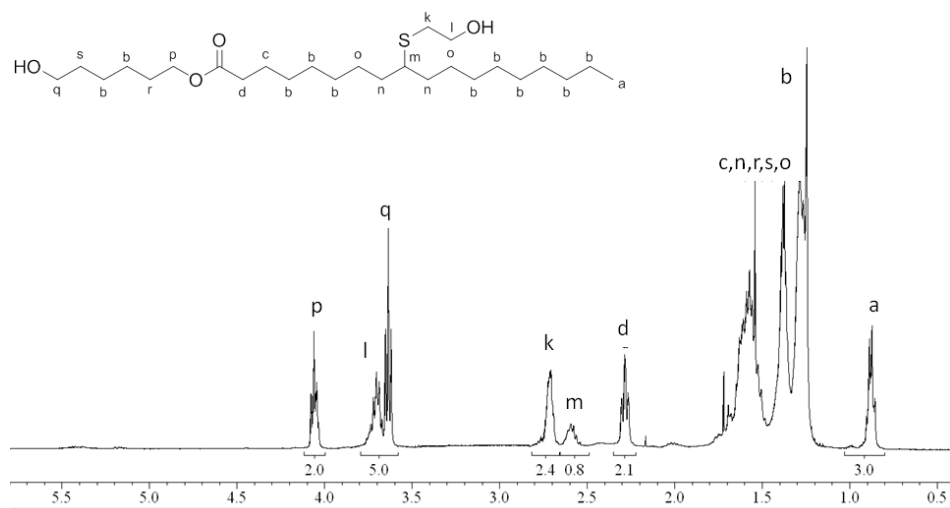

**Figure S4.** <sup>1</sup>H NMR of MEC<sub>6</sub>

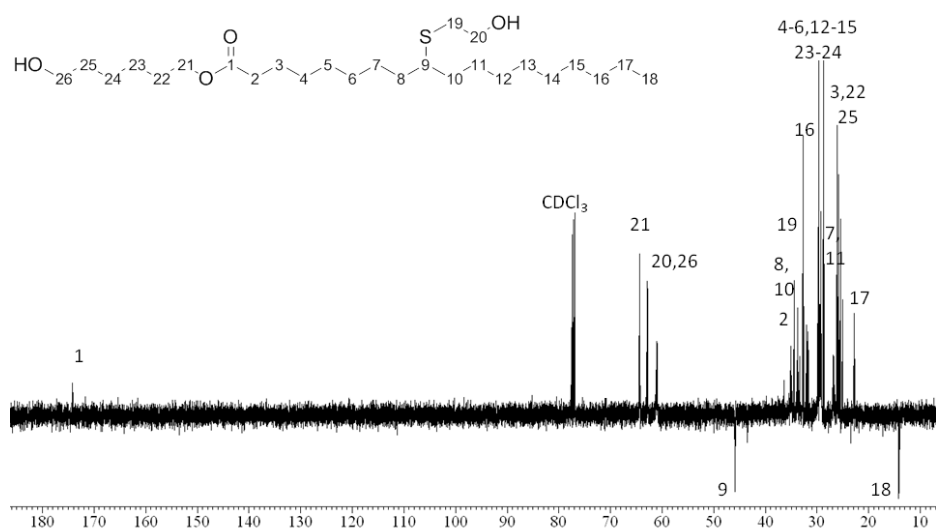

**Figure S5.**  $^{13}\text{C}$  NMR of MEC<sub>6</sub>

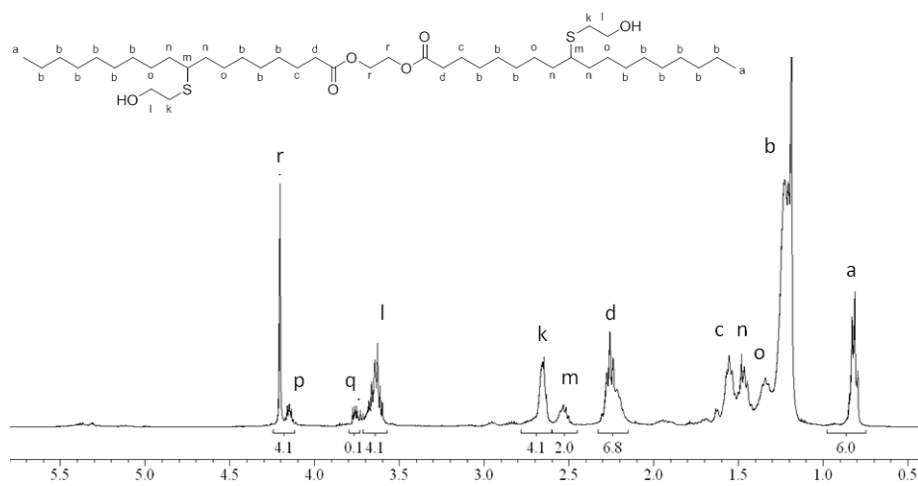

**Figure S6.** <sup>1</sup>H NMR of DEC<sub>2</sub>

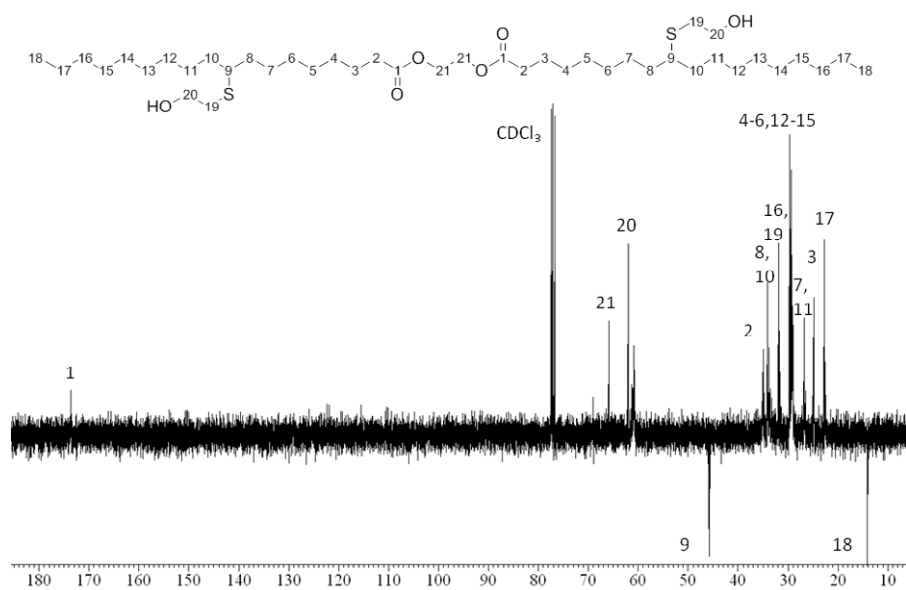

**Figure S7.**  $^{13}\text{C}$  NMR of DEC<sub>2</sub>



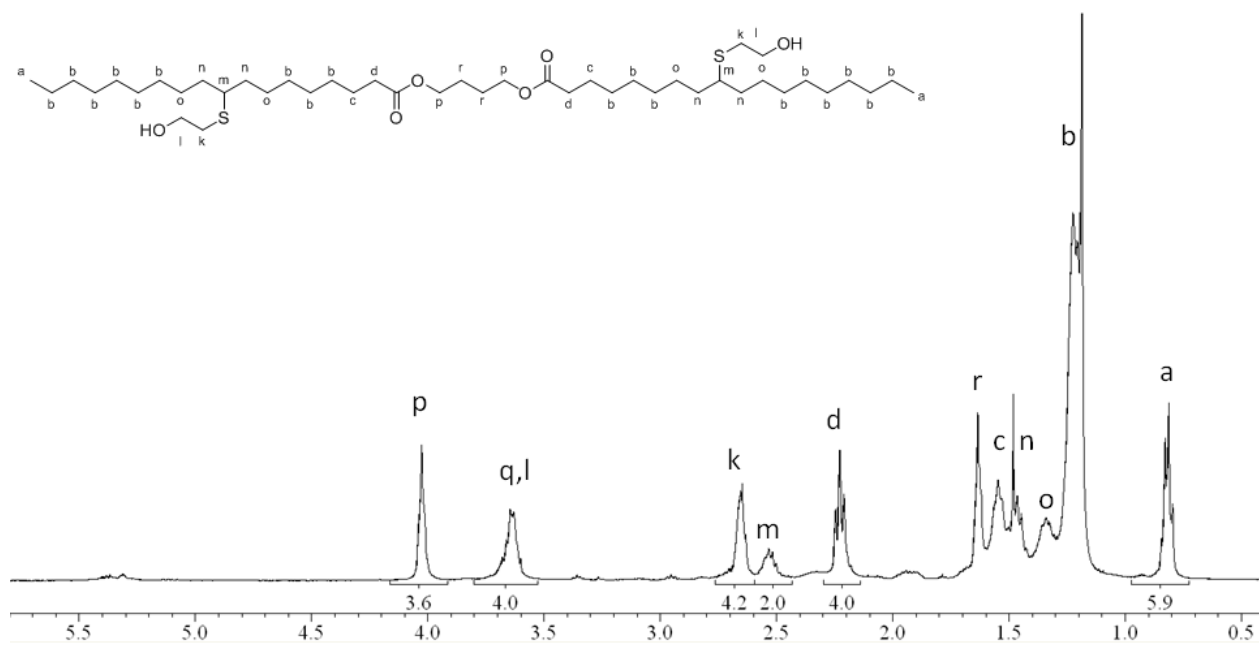

**Figure S8.** <sup>1</sup>H NMR of DEC<sub>4</sub>

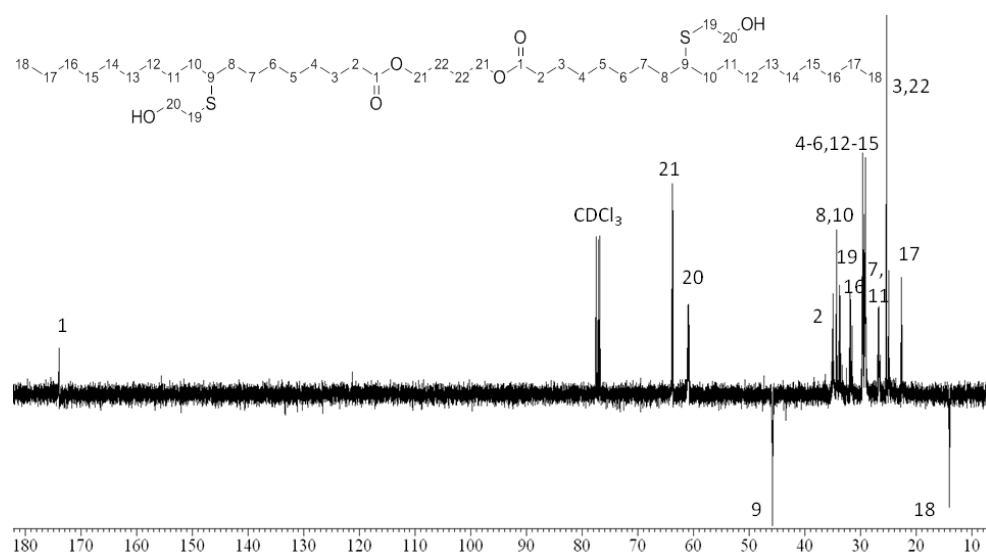

**Figure S9.**  $^{13}\text{C}$  NMR of DEC<sub>4</sub>

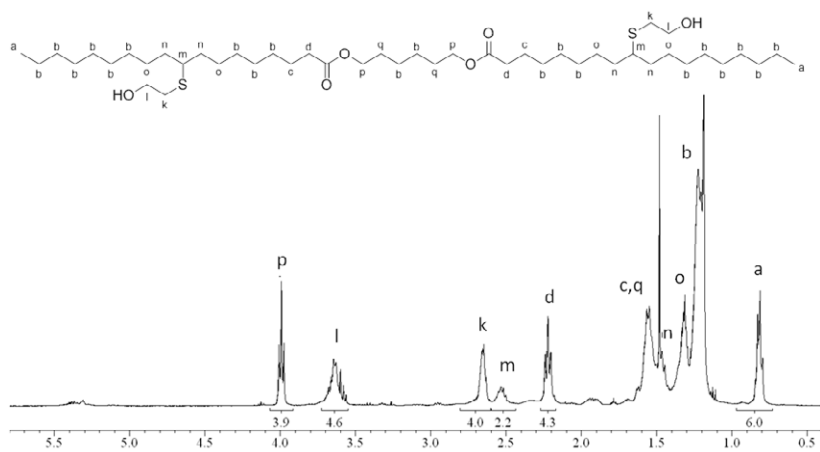

**Figure S10.**  $^1\text{H}$  NMR of DEC<sub>6</sub>

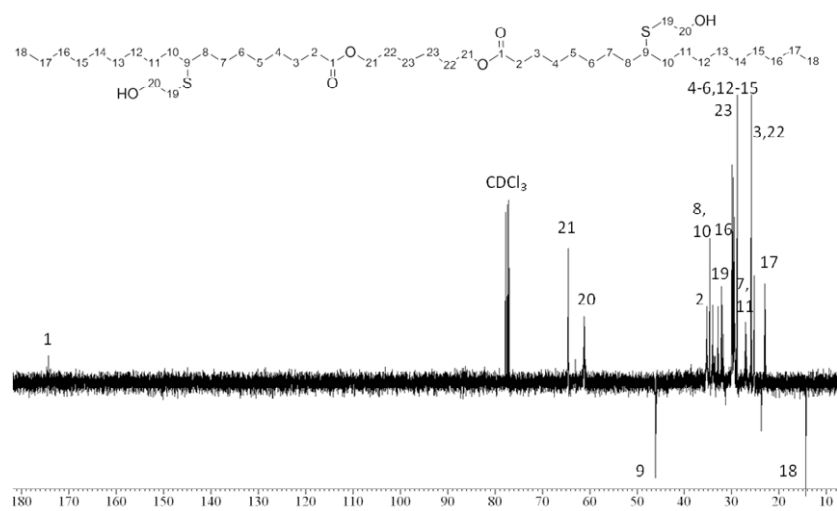

**Figure S11.** <sup>13</sup>C NMR of DEC<sub>6</sub>

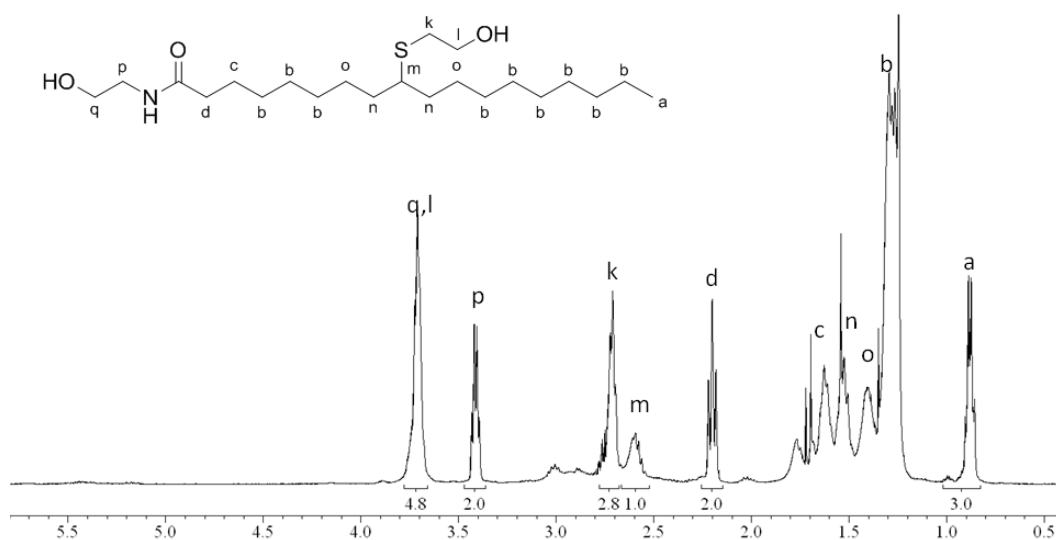

**Figure S12.** <sup>1</sup>H of MAC<sub>2</sub>

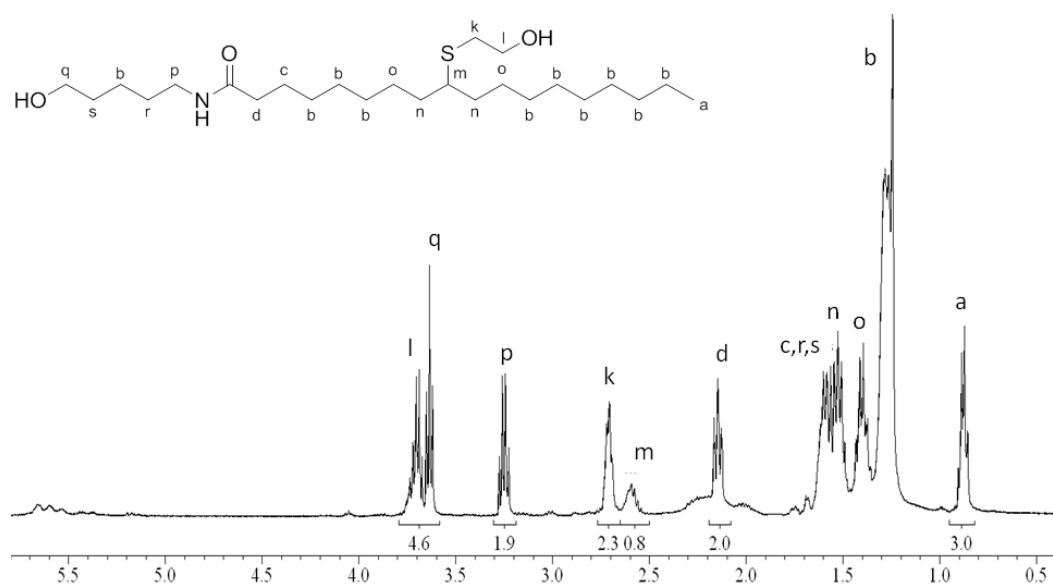

**Figure S13.** <sup>1</sup>H NMR of MAC<sub>5</sub>

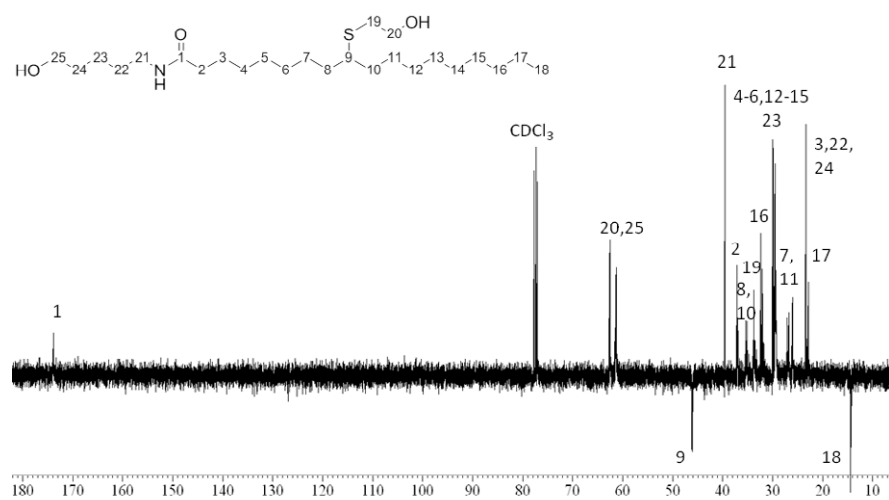

**Figure S14.**  $^{13}\text{C}$  NMR of MAC<sub>5</sub>

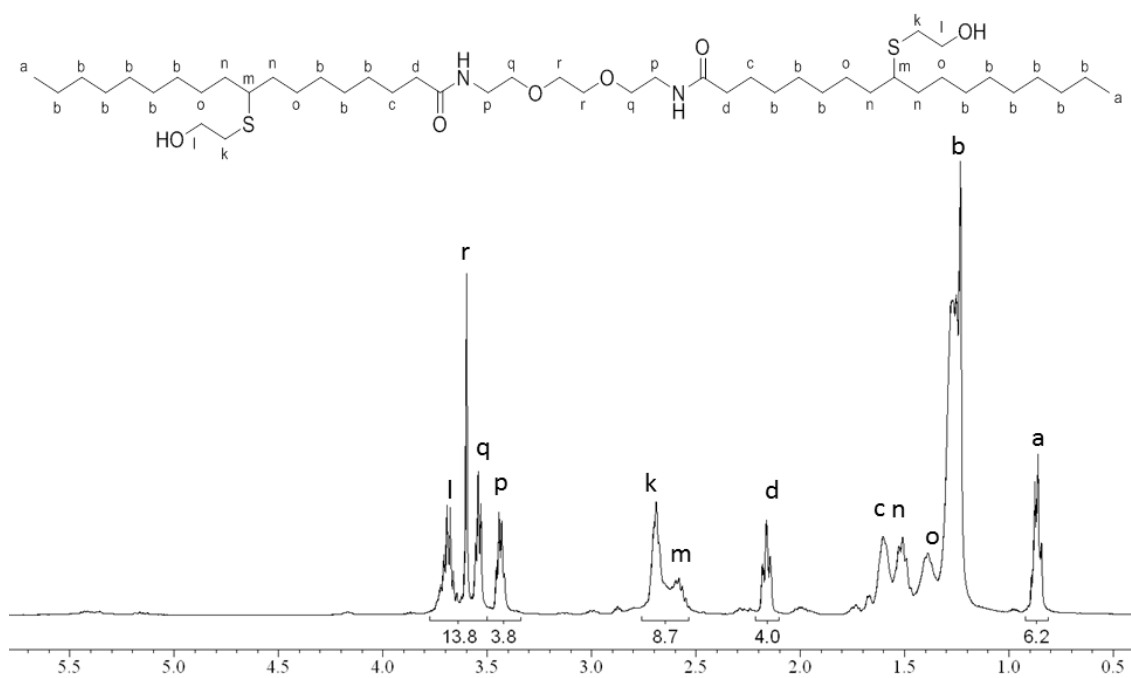

**Figure S15.** <sup>1</sup>H NMR of DAC<sub>8</sub>



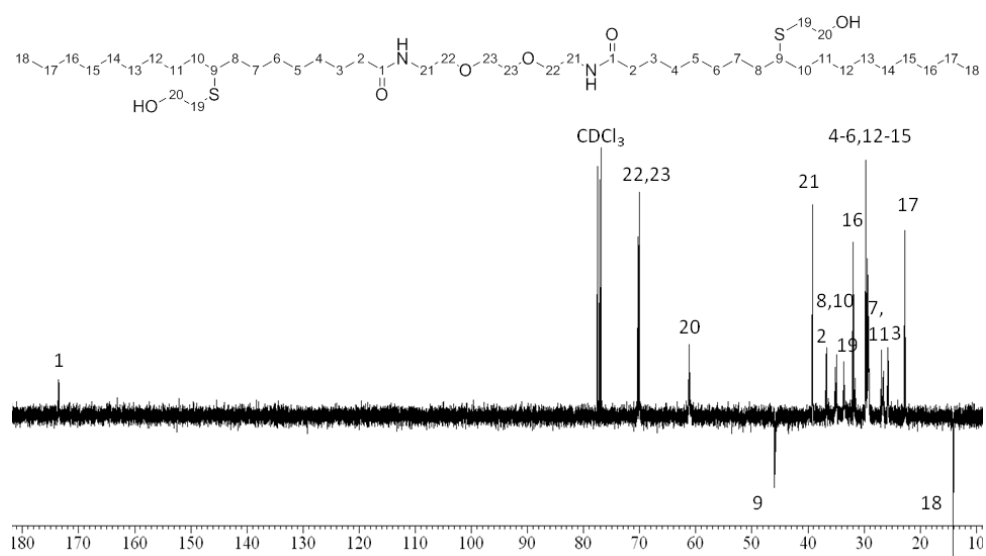

**Figure S16.** <sup>13</sup>C NMR of DAC<sub>8</sub>

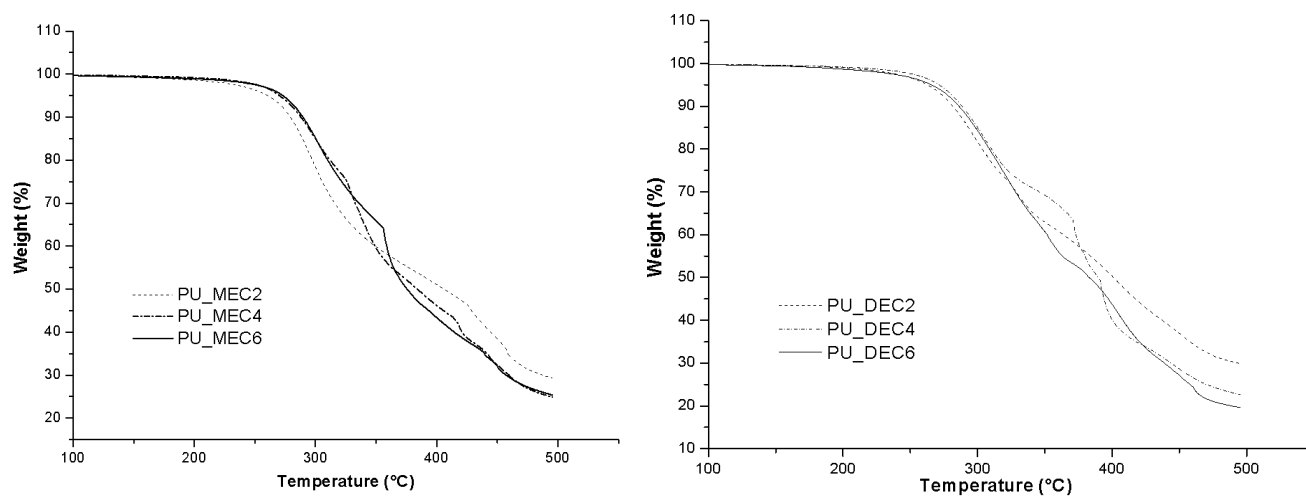

**Figure S17.** Thermograms recorded under nitrogen of polyurethanes obtained from monoester containing pseudo-telechelic diols (left) and from diester containing pseudo-telechelic diols (right)
